# Supplementary material for: The Efficacy of Electromagnetic Diathermy for the Treatment of Musculoskeletal Disorders: A Systematic Review with Meta-Analysis
Source: MDPI journal article supplement (doi:10.3390/jcm12123956), 2023-06-09
Supplement: s1 [file s1]

**Supplementary Materials File S1 – Outcome measure hierarchy.**

| <b>Osteoarthritis</b>          | <b>Pain relief</b>                                                                                                                                                          | <b>Function</b>                                                                                                                                                                                                                                                                                                                                                                                                                              | <b>Quality of life</b>                                                                                                                                                                                                          |
|--------------------------------|-----------------------------------------------------------------------------------------------------------------------------------------------------------------------------|----------------------------------------------------------------------------------------------------------------------------------------------------------------------------------------------------------------------------------------------------------------------------------------------------------------------------------------------------------------------------------------------------------------------------------------------|---------------------------------------------------------------------------------------------------------------------------------------------------------------------------------------------------------------------------------|
|                                | <ol style="list-style-type: none"> <li>1. Visual Analogue Scale</li> <li>2. Numerical Pain Rating Scale</li> <li>3. WOMAC (pain)</li> <li>4. Likert scale</li> </ol>        | <ol style="list-style-type: none"> <li>1. WOMAC (function)</li> <li>2. WOMAC (total)</li> <li>3. Lequesne Index</li> <li>4. Lysholm Knee Scoring Scale</li> <li>5. Stair Climbing Test</li> <li>6. Walk Test (10/15/x meter)</li> <li>7. Timed Up and Go Test</li> <li>8. Strength measures</li> <li>9. Range of Motion</li> </ol>                                                                                                           | <ol style="list-style-type: none"> <li>1. SF-36 (overall scale)</li> <li>2. SF-36 (general health)</li> <li>3. SF-36 (physical functioning)</li> <li>4. KOOS (QoL subscale)</li> <li>5. General Health Questionnaire</li> </ol> |
| <b>Low Back Pain</b>           | <ol style="list-style-type: none"> <li>1. Visual Analogue Scale</li> <li>2. Numerical Pain Rating Scale</li> <li>3. Likert scale</li> <li>4. Lattinen Test score</li> </ol> | <ol style="list-style-type: none"> <li>1. Oswestry Disability Index</li> <li>2. Roland Morris Disability Questionnaire</li> </ol>                                                                                                                                                                                                                                                                                                            | <ol style="list-style-type: none"> <li>1. SF-36 (overall scale)</li> <li>2. SF-36 (general health)</li> <li>3. SF-36 (physical functioning)</li> </ol>                                                                          |
| <b>Shoulder tendinopathies</b> | <ol style="list-style-type: none"> <li>1. Visual Analogue Scale</li> <li>2. Numerical Pain Rating Scale</li> <li>3. Likert scale</li> </ol>                                 | <ol style="list-style-type: none"> <li>1. QuickDASH score</li> <li>2. Constant-Murley score (ADL)</li> <li>3. Contant-Murley score (general)</li> <li>4. Shoulder Pain and Disability Index (disability scale)</li> <li>5. Shoulder Pain and Disability Index (total score)</li> <li>6. Shoulder Disability Questionnaire</li> <li>7. Strength measure</li> <li>8. Range of Motion (active)</li> <li>9. Range of Motion (passive)</li> </ol> | <ol style="list-style-type: none"> <li>1. SF-36 (overall scale)</li> <li>2. SF-36 (general health)</li> <li>3. SF-36 (physical functioning)</li> </ol>                                                                          |
| <b>Frozen shoulder</b>         | <ol style="list-style-type: none"> <li>1. Visual Analogue Scale</li> <li>2. Numerical Pain Rating Scale</li> <li>3. Likert scale</li> </ol>                                 | <ol style="list-style-type: none"> <li>1. QuickDASH score</li> <li>2. Constant-Murley score (ADL)</li> <li>3. Contant-Murley score (general)</li> <li>4. Shoulder Pain and Disability Index (disability scale)</li> </ol>                                                                                                                                                                                                                    | <ol style="list-style-type: none"> <li>1. SF-36 (overall scale)</li> <li>2. SF-36 (general health)</li> <li>3. SF-36 (physical functioning)</li> </ol>                                                                          |

|  |  |                                                                                                                                                                                   |  |
|--|--|-----------------------------------------------------------------------------------------------------------------------------------------------------------------------------------|--|
|  |  | 5. Shoulder Pain and Disability Index (total score)<br>6. Shoulder Disability Questionnaire<br>7. Range of Motion (passive)<br>8. Range of Motion (active)<br>9. Strength measure |  |
|--|--|-----------------------------------------------------------------------------------------------------------------------------------------------------------------------------------|--|

ADL: Activity of Daily Living ; DASH: Disability of the Arm, Shoulder and Hand score ; KOOS: Knee Injury and Osteoarthritis Outcome Score ; SF-36: La Short Form Health Survey 36 ; WOMAC: Western Ontario and McMaster University Osteoarthritis Index ; QoL: Quality of Life.
