# Supplementary material for: The Efficacy of Electromagnetic Diathermy for the Treatment of Musculoskeletal Disorders: A Systematic Review with Meta-Analysis
Source: MDPI journal article supplement (doi:10.3390/jcm12123956), 2023-06-09
Supplement: s1 [file s1]

| AUTHOR & YEAR | PATHOLOGY                   | TYPE OF DIATHERMY | DEVICE                           | FREQUENCY |
|---------------|-----------------------------|-------------------|----------------------------------|-----------|
| Akyol 2010    | Knee and hip osteoarthritis | SWD               | Curapuls 491                     | 27.12 Mhz |
| Atamaz 2006   | Knee and hip osteoarthritis | SWD               | NR                               | NR        |
| Atamaz 2012   | Knee and hip osteoarthritis | SWD               | Intelect shortwave Model n. 3812 | NR        |
| Bezalel 2010  | Knee and hip osteoarthritis | SWD               | Curapuls 670 (Enraf-Nonius)      | 300 Hz    |

| AUTHOR & YEAR    | PATHOLOGY                   | TYPE OF DIATHERMY | DEVICE                                       | FREQUENCY |
|------------------|-----------------------------|-------------------|----------------------------------------------|-----------|
| Boyaci 2013      | Knee and hip osteoarthritis | SWD               | Curapuls 970 (Enraf-Nonius)                  | 27.12 MHz |
| Callaghan 2005   | Knee and hip osteoarthritis | SWD               | EMS Megapulse (EMS Ltd, UK)                  | 27 MHz    |
| Cantarini 2006   | Knee and hip osteoarthritis | SWD               | SIMENS Ultraterm 642 E                       | NR        |
| Cetin 2008       | Knee and hip osteoarthritis | SWD               | Curapuls 419 (Enraf-NoniusB Delftechpark 39) | 27.12 MHz |
| Chamberlain 1982 | Knee and hip osteoarthritis | SWD               | NR                                           | NR        |
| Clarke 1974      | Knee and hip osteoarthritis | SWD               | NR                                           | NR        |
| Fukuda 2011      | Knee and hip osteoarthritis | SWD               | Diatermed II                                 | 27.12 MHz |
| Fukuda 2008      | Knee and hip osteoarthritis | SWD               | Diatermed II                                 | 27.12 MHz |

| AUTHOR & YEAR            | PATHOLOGY                                                        | TYPE OF DIATHERMY | DEVICE                        | FREQUENCY |
|--------------------------|------------------------------------------------------------------|-------------------|-------------------------------|-----------|
| Gomes 2020               | Knee and hip osteoarthritis                                      | SWD               | Ibramed (Amparo, SP, Brasil)  | 27.12 Mhz |
| İşik 2020                | Knee and hip osteoarthritis                                      | SWD               | Curapuls 970 (Enraf-Nonius)   | 27.12MHz  |
| Jia 2022                 | Knee and hip osteoarthritis                                      | SWD               | Curapulse 970 (Enraf–Nonius)  | 27.12 Mhz |
| Klaber Moffett 1996/1994 | Knee and hip osteoarthritis                                      | SWD               | Ukramed IIS 601               | NR        |
| Ovanessian 2008          | Knee and hip osteoarthritis                                      | SWD               | Diatermed II                  | 27.12MHz  |
| Rattanachaiyanont 2008   | Knee and hip osteoarthritis in<br>peri-/post-menopausal<br>women | SWD               | ULTRAMED (Bosch) model 11s601 | 27.12MHz  |

| AUTHOR & YEAR | PATHOLOGY                   | TYPE OF DIATHERMY | DEVICE                      | FREQUENCY        |
|---------------|-----------------------------|-------------------|-----------------------------|------------------|
| Terzi 2017    | Knee and hip osteoarthritis | SWD               | NR                          | NR               |
| Teslim 2013   | Knee and hip osteoarthritis | SWD               | Curapuls 967                | NR               |
| Tüzün 2003    | Knee and hip osteoarthritis | SWD               | Curapuls 419 (Enraf-Nonius) | 110 Hz and 20 Hz |
| Wright 1964   | Knee and hip osteoarthritis | SWD               | NR                          | NR               |

| AUTHOR & YEAR | PATHOLOGY                   | TYPE OF DIATHERMY | DEVICE                                                                                   | FREQUENCY  |
|---------------|-----------------------------|-------------------|------------------------------------------------------------------------------------------|------------|
| Giombini 2010 | Knee and hip osteoarthritis | MWD               | “ALBA Hyperthermia System” (RESTEK SRL ITALY)                                            | 433.92 MHz |
| Rabini 2012   | Knee and hip osteoarthritis | MWD               | Smarterapia Sigma Hyperthermia System (Easytech srl, Borgo San Lorenzo, Florence, Italy) | 434 MHz    |
| Alcidi 2007   | Knee and hip osteoarthritis | LPRER             | NR (own built)                                                                           | 500 KHz    |
| Cocetta 2018  | Knee and hip osteoarthritis | CRET              | Tecar Unibell HCR 902 device (Unibell, Calco, Lecco, Italy)                              | 485 KHz    |
| Kumaran 2019  | Knee and hip osteoarthritis | CRET              | Indiba Activ 902                                                                         | 448 KHz    |
| Ahmed 2009    | Low back pain               | SWD               | NR                                                                                       | NR         |
| Ansari 2022   | Low back pain               | SWD               | NR                                                                                       | 27.12 Mhz  |
| Gibson 1985   | Low back pain               | SWD               | NR                                                                                       | NR         |

| AUTHOR & YEAR   | PATHOLOGY     | TYPE OF DIATHERMY | DEVICE                                      | FREQUENCY |
|-----------------|---------------|-------------------|---------------------------------------------|-----------|
| Igatpurkar 2013 | Low back pain | SWD               | NR                                          | NR        |
| Kumar 2009      | Low back pain | SWD               | Medichem Electronics                        | NR        |
| Kumar 2009a     | Low back pain | SWD               | Medichem Electronics                        | NR        |
| Shakoor 2008    | Low back pain | SWD               | NR                                          | 27.33 MHz |
| Durmus 2014     | Low back pain | MWD               | Curadar 409 (Enraf–Nonius, The Netherlands) | 2.450 MHz |

| AUTHOR & YEAR       | PATHOLOGY               | TYPE OF DIATHERMY | DEVICE                                                        | FREQUENCY                 |
|---------------------|-------------------------|-------------------|---------------------------------------------------------------|---------------------------|
| Farrell 1982        | Low back pain           | MWD               | NR                                                            | NR                        |
| Notarnicola 2017    | Low back pain           | CRET              | Doctor Tecar Therapy™, Mectronic Medical SRL, Bergamo, Italy  | Between 0.45 and 0.60 MHz |
| Wachi 2022          | Low back pain           | CRET              | Physio Radio Stim Pro (SAKAI Medical Co., Ltd., Tokyo, Japan) | 500 kHz                   |
| Zati 2018           | Low back pain           | CRET              | NR                                                            | 450-1000 kHz              |
| Jiménez-García 2008 | Shoulder tendinopathies | SWD               | Elios-uniphy-phyaction performa                               | 27 MHz                    |
| Yilmaz 2018         | Shoulder tendinopathies | SWD               | ITO SW-180 device                                             | 27.12 Mhz                 |

| AUTHOR & YEAR     | PATHOLOGY                           | TYPE OF DIATHERMY | DEVICE                                                                                   | FREQUENCY  |
|-------------------|-------------------------------------|-------------------|------------------------------------------------------------------------------------------|------------|
|                   |                                     |                   | Curadar 409 (Enraf–Nonius, The Nederland)                                                | 2.450 MHz  |
| Akyol 2012        | Shoulder tendinopathies             | MWD               |                                                                                          |            |
| Giombini 2006     | Shoulder tendinopathies in athletes | MWD               | “ALBA Hyperthermia System” (RESTEK SRL ITALY)                                            | 433.92 MHz |
| Rabini 2012       | Shoulder tendinopathies             | MWD               | Smarterapia Sigma Hyperthermia System (Easytech srl, Borgo San Lorenzo, Florence, Italy) | 434 MHz    |
| Avendaño-Coy 2022 | Shoulder tendinopathies             | CRET              | INDIBA Activ CT9 device (INDIBA S.A., Spain)                                             | 448 Khz    |
| Guler-Uysal 2004  | Frozen shoulder                     | SWD               | KSF Model equipment ITO (Tokyo-Japan)                                                    | 27.12 Mhz  |
| Leung 2008        | Frozen shoulder                     | SWD               | Curapuls 419 (Enraf-Nonius)                                                              | 27.12 Mhz  |
| Hammad 2019       | Frozen shoulder                     | SWD/MWD           | NR                                                                                       | NR         |



| AUTHOR & YEAR  | PATHOLOGY                                | TYPE OF DIATHERMY | DEVICE                                                                                         | FREQUENCY |
|----------------|------------------------------------------|-------------------|------------------------------------------------------------------------------------------------|-----------|
| Boyaci 2014    | Carpal tunnel syndrome                   | SWD               | Curapuls 970 (Enraf-Nonius)                                                                    | NR        |
| Incebiyik 2015 | Carpal tunnel syndrome                   | SWD               | Curapuls 970 (Enraf-Nonius)                                                                    | 27 MHz    |
| Frasca 2011    | Carpal tunnel syndrome                   | MWD               | Smarterapia Sigma Hyperthermia System<br>(Easytech srl, Borgo San Lorenzo, Florence,<br>Italy) | 434 MHz   |
| Cheng 2018     | Lower limb tendinopathies in<br>athletes | MWD               | Fysiomed (Edegem, Belgium)                                                                     | NR        |
| Giombini 2002  | Lower limb tendinopathies in<br>athletes | MWD               | “ALBA Hyperthermia System” (RESTEK SRL<br>ITALY)                                               | 434 MHz   |
| Dziedzic 2005  | Neck pain                                | SWD               | NR                                                                                             | NR        |
| Ortega 2013    | Neck pain                                | MWD               | Enraf–Nonius Radarmed                                                                          | NR        |
| Verma 2012     | Patellofemoral pain                      | SWD               | NR                                                                                             | 27.12 Mhz |

| AUTHOR & YEAR         | PATHOLOGY                                   | TYPE OF DIATHERMY | DEVICE                                          | FREQUENCY  |
|-----------------------|---------------------------------------------|-------------------|-------------------------------------------------|------------|
| Albornoz-Cabello 2020 | Patellofemoral pain                         | MDR               | ABD Modular (Biotronic Advance Develops, Spain) | 840 Khz    |
| Gray 1995             | Temporomandibular pain dysfunction syndrome | SWD.              | NR                                              | NR         |
| Talaat 1986           | Temporomandibular pain dysfunction syndrome | SWD               | Ultratherma 708-Siemens                         | NR         |
| Nakamura 2022         | DOMS in healthy subjects                    | CRET              | Indiba Active Pro Recovery HCR904               | 448 Khz    |
| Visconti 2020         | DOMS in athletes                            | CRET              | Red Coral, Tecnosix, Sixtus (Italy)             | 750 Khz    |
| Livesley 1992         | Fractures of the neck of the humerus        | SWD               | Curapuls                                        | NR         |
| Babaei-Ghazani 2019   | Lateral epicondylitis                       | SWD               | Shortwave Unit SW 400s, ITO CO (Germany)        | 27.12 Mhz  |
| Badur 2020            | Ulnar nerve entrapment                      | SWD               | NR                                              | 27.12 Mhz  |
| Pasila 1978           | Ankle or foot sprain                        | SWD               | NR                                              | NR         |
| Giombini 2001         | Acute muscle injury in athletes             | MWD               | “ALBA Hyperthermia System” (RESTEK SRL ITALY)   | 433.92 MHz |

| AUTHOR & YEAR     | PATHOLOGY                   | TYPE OF DIATHERMY | DEVICE                                      | FREQUENCY |
|-------------------|-----------------------------|-------------------|---------------------------------------------|-----------|
| Georgoudis 2017   | Tension-type headache       | MWD               | NR                                          | NR        |
| García-Marín 2021 | Total Knee Replacement pain | CRET              | Biotronic Advance Develops (Granada, Spain) | 840 Khz   |

| AUTHOR & YEAR | INTERVENTION I                                                                                                                                                                                                                                  | INTERVENTION II | INTERVENTION III | INTERVENTION IV | INTERVENTION V |
|---------------|-------------------------------------------------------------------------------------------------------------------------------------------------------------------------------------------------------------------------------------------------|-----------------|------------------|-----------------|----------------|
| Akyol 2010    | SWD + active exercises. SWD: 40 min, 12 sessions, 3 days a week for 4 weeks; active exercises: 12 sessions, 3 days a week for 4 weeks.                                                                                                          |                 |                  |                 |                |
| Atamaz 2006   | SWD + infrared therapy + interferential therapy. SWD: 20 min, 15 sessions, 5 days a week for 3 weeks; infrared therapy: 20 min, 15 sessions, 5 days a week for 3 weeks; interferential therapy: 20 min, 15 sessions, 5 days a week for 3 weeks. |                 |                  |                 |                |
| Atamaz 2012   | SWD + active exercises + home based exercises + education. SWD: 15 sessions, 5 days a week for 3 weeks; active exercises: 9 sessions, 3 days a week for 3 weeks; home based exercises: NR; education: 60 min, 1 sessions.                       |                 |                  |                 |                |
| Bezalel 2010  | SWD. 20 min, 6 sessions.                                                                                                                                                                                                                        |                 |                  |                 |                |

| AUTHOR & YEAR    | INTERVENTION I                                                                                                                                           | INTERVENTION II                                              | INTERVENTION III | INTERVENTION IV | INTERVENTION V |
|------------------|----------------------------------------------------------------------------------------------------------------------------------------------------------|--------------------------------------------------------------|------------------|-----------------|----------------|
| Boyaci 2013      | SWD. 20 min, 10 sessions, 5 days a week for 2 weeks.                                                                                                     |                                                              |                  |                 |                |
| Callaghan 2005   | SWD high dose. 20 min, 6 sessions, 3 days a week for 2 weeks.                                                                                            | SWD low dose. 20 min, 6 sessions, 3 days a week for 2 weeks. |                  |                 |                |
| Cantarini 2006   | SWD. 15 min, 10 sessions, 3 days a week for 3 weeks.                                                                                                     |                                                              |                  |                 |                |
| Cetin 2008       | SWD + hot pack + active exercises . SWD: 15 min, 24 sessions, 3 days a week for 8 weeks; hot packs and exercise: 24 sessions, 3 days a week for 8 weeks. |                                                              |                  |                 |                |
| Chamberlain 1982 | SWD. 12 sessions, 3 days a week for 4 weeks.                                                                                                             |                                                              |                  |                 |                |
| Clarke 1974      | SWD. 9 sessions, 3 days a week for 3 weeks.                                                                                                              |                                                              |                  |                 |                |
| Fukuda 2011      | SWD high dose. 38 min, 9 sessions, 3 days a week for 3 weeks.                                                                                            | SWD low dose. 19 min, 9 sessions, 3 days a week for 3 weeks. |                  |                 |                |
| Fukuda 2008      | SWD high dose. 38 min, 9 sessions, 3 days a week for 3 weeks.                                                                                            | SWD low dose. 19 min, 9 sessions, 3 days a week for 3 weeks. |                  |                 |                |

| AUTHOR & YEAR            | INTERVENTION I                                                                                                                                                                      | INTERVENTION II                                           | INTERVENTION III | INTERVENTION IV | INTERVENTION V |
|--------------------------|-------------------------------------------------------------------------------------------------------------------------------------------------------------------------------------|-----------------------------------------------------------|------------------|-----------------|----------------|
| Gomes 2020               | SWD + active exercises. SWD: 20 min, 24 sessions, 3 days a week for 8 weeks; active exercises: 90 min, 24 sessions, 3 days a week for 8 weeks.                                      |                                                           |                  |                 |                |
| Işık 2020                | SWD + injection + home based active exercises. SWD and injection: 20 min, 3 sessions, once a week for 3 weeks; home-based exercise: 40 min, 36 sessions, 6 days a week for 6 weeks. |                                                           |                  |                 |                |
| Jia 2022                 | SWD. 20 min, 12 sessions, once a day.                                                                                                                                               |                                                           |                  |                 |                |
| Klaber Moffett 1996/1994 | SWD. 15 min, 9 sessions, 3 days a week for 3 weeks.                                                                                                                                 |                                                           |                  |                 |                |
| Ovanessian 2008          | SWD 33kj. 38 min, 9 sessions, 3 days a week for 3 weeks.                                                                                                                            | SWD 17 kj. 19 min, 9 sessions, 3 days a week for 3 weeks. |                  |                 |                |
| Rattanachaiyanont 2008   | SWD + active exercises + education. SWD: 20 min, 9 sessions, 3 days a week for 3 weeks. Active exercise and education: NR.                                                          |                                                           |                  |                 |                |

| AUTHOR & YEAR | INTERVENTION I                                                                                                                                                                                                                                                                                                                  | INTERVENTION II                                                                                                                                                                                                                            | INTERVENTION III | INTERVENTION IV | INTERVENTION V |
|---------------|---------------------------------------------------------------------------------------------------------------------------------------------------------------------------------------------------------------------------------------------------------------------------------------------------------------------------------|--------------------------------------------------------------------------------------------------------------------------------------------------------------------------------------------------------------------------------------------|------------------|-----------------|----------------|
|               | SWD + education + active exercises + TENS + hot pack.<br>SWD: 15 min, 10 sessions, 5 days a week for 2 weeks; education: NR; active exercises: 84 at home sessions, 14 times a week (twice a day) for 6 weeks; TENS: 20 min, 10 sessions, 5 days a week for 2 weeks; hot packs: 20 min, 10 sessions, 5 days a week for 2 weeks. |                                                                                                                                                                                                                                            |                  |                 |                |
| Terzi 2017    |                                                                                                                                                                                                                                                                                                                                 |                                                                                                                                                                                                                                            |                  |                 |                |
|               | SWD continuos + active exercises + massage with diclofenac. SWD continuous: 20 min, 8 sessions, 2 days a week for 4 weeks; active exercise: 15 min, 8 sessions, 2 days a week for 4 weeks; massage with diclofenac: NR.                                                                                                         | SWD pulsed + active exercises + massage with diclofenac. SWD pulsed: 20 min, 8 sessions, 2 days a week for 4 weeks; active exercise: 15 min, 8 sessions, 2 days a week for 4 weeks; massage with diclofenac: NR.                           |                  |                 |                |
| Teslim 2013   |                                                                                                                                                                                                                                                                                                                                 |                                                                                                                                                                                                                                            |                  |                 |                |
|               | SWD high power + ultrasound + active exercises. SWD high power: 15 min, 10 sessions, 5 days a week for 2 weeks; ultrasound: 5 min, 10 sessions, 5 days a week for 2 weeks; active exercises: 10 min, 10 sessions, 5 days a week for 2 weeks.                                                                                    | SWD low power + ultrasound + active exercises. SWD low power: 15 min, 10 sessions, 5 days a week for 2 weeks; ultrasound: 5 min, 10 sessions, 5 days a week for 2 weeks; active exercises: 10 min, 10 sessions, 5 days a week for 2 weeks. |                  |                 |                |
| Tüzün 2003    |                                                                                                                                                                                                                                                                                                                                 |                                                                                                                                                                                                                                            |                  |                 |                |
|               | SWD. 20 minutes, 18 sessions, 3 days a week for 6 weeks.                                                                                                                                                                                                                                                                        |                                                                                                                                                                                                                                            |                  |                 |                |
| Wright 1964   |                                                                                                                                                                                                                                                                                                                                 |                                                                                                                                                                                                                                            |                  |                 |                |

| AUTHOR & YEAR | INTERVENTION I                                                                                                                                                                                                 | INTERVENTION II | INTERVENTION III | INTERVENTION IV | INTERVENTION V |
|---------------|----------------------------------------------------------------------------------------------------------------------------------------------------------------------------------------------------------------|-----------------|------------------|-----------------|----------------|
| Giombini 2010 | MWD. 30 min, 12 sessions, 3 days a week for 4 weeks.                                                                                                                                                           |                 |                  |                 |                |
| Rabini 2012   | MWD. 30 min, 12 sessions, 3 days a week for 4 weeks.                                                                                                                                                           |                 |                  |                 |                |
| Alcidi 2007   | LPRER. 20 min, 5 sessions, 5 days for 1 weeks.                                                                                                                                                                 |                 |                  |                 |                |
| Cocetta 2018  | CRET. 20 min (5 min of capacitive, 10 min of resistive, 5 min of capacitive), 6 sessions, 3 days a week for 2 weeks.                                                                                           |                 |                  |                 |                |
| Kumaran 2019  | CRET + home based active exercises + education. CRET: 15 minutes (5 min of capacitive and 10 min of resistive), 8 sessions, 2 days a week for 4 weeks; home based exercise + education: 3 sessions in 4 weeks. |                 |                  |                 |                |
| Ahmed 2009    | SWD + drug + active exercises + education. SWD: 15 min, 18 sessions, 3 days a week for 6 weeks; drug: 7 days a week; active exercise: NR; education: NR.                                                       |                 |                  |                 |                |
| Ansari 2022   | SWD. 20 min, 10 sessions, on alternate days for 3 weeks.                                                                                                                                                       |                 |                  |                 |                |
| Gibson 1985   | SWD. 12 sessions, 3 days a week for 4 weeks.                                                                                                                                                                   |                 |                  |                 |                |



| AUTHOR & YEAR    | INTERVENTION I                                                                                                                                                                                                       | INTERVENTION II | INTERVENTION III | INTERVENTION IV | INTERVENTION V |
|------------------|----------------------------------------------------------------------------------------------------------------------------------------------------------------------------------------------------------------------|-----------------|------------------|-----------------|----------------|
| Ilgatpurkar 2013 | SWD + traction + active exercises. SWD: NR; traction: 15 min; active exercises: NR.                                                                                                                                  |                 |                  |                 |                |
| Kumar 2009       | SWD + ultrasound + active exercises. SWD: 15 min, 18 sessions; ultrasound: 8 min, 18 sessions; active exercises: NR.                                                                                                 |                 |                  |                 |                |
| Kumar 2009a      | SWD + ultrasound + active exercises. SWD: 15 min, 20 sessions; ultrasound: 5 min, 20 sessions; active exercises: 20 sessions.                                                                                        |                 |                  |                 |                |
| Shakoor 2008     | SWD + drug + active exercises + education. SWD: 15 min, 18 sessions, 3 days a week for 6 weeks; drug: twice a day 7 days a week; active exercise: 84 sessions, twice a day 7 days a week for 6 weeks; education: NR. |                 |                  |                 |                |
| Durmus 2014      | MWD + active exercises. MWD: 20 min, 18 sessions, 3 days a week for 6 weeks; active exercises: 60 min, 18 sessions, 3 days a week for 6 weeks.                                                                       |                 |                  |                 |                |

| AUTHOR & YEAR       | INTERVENTION I                                                                                                                                                                                                                               | INTERVENTION II                                                                                                                                                      | INTERVENTION III | INTERVENTION IV | INTERVENTION V |
|---------------------|----------------------------------------------------------------------------------------------------------------------------------------------------------------------------------------------------------------------------------------------|----------------------------------------------------------------------------------------------------------------------------------------------------------------------|------------------|-----------------|----------------|
|                     | MWD + active exercises + education. MWD: 15 min, 9 sessions, 3 days a week for 3 weeks; active exercises: 9 sessions, 3 days a week for 3 weeks (also 3 or 4 days of home-based exercise); education: 9 sessions, 3 days a week for 3 weeks. |                                                                                                                                                                      |                  |                 |                |
| Farrell 1982        |                                                                                                                                                                                                                                              |                                                                                                                                                                      |                  |                 |                |
| Notarnicola 2017    | CRET. 20 min (10 min of capacitive, 10 min of resistive), 10 sessions, 5 days a week for 2 weeks.                                                                                                                                            |                                                                                                                                                                      |                  |                 |                |
| Wachi 2022          | CRET. 15 min (5 min of capacitive, 10 min of resistive).                                                                                                                                                                                     |                                                                                                                                                                      |                  |                 |                |
| Zati 2018           | Deep Heathing Therapy. 20 min, 10 sessions in 2 weeks.                                                                                                                                                                                       | Superficial Heathing Therapy. 20 min, 10 sessions in 2 weeks.                                                                                                        |                  |                 |                |
| Jiménez-García 2008 | SWD + ultrasound + active exercises. SWD: 15 sessions, 5 days a week for 3 weeks; ultrasound: 5 min, 15 sessions, 5 days a week for 3 weeks; active exercise: 15 sessions, 5 days a week for 3 weeks.                                        |                                                                                                                                                                      |                  |                 |                |
| Yilmaz 2018         | SWD + active exercises + cold pack + drug. SWD: 20 min, 10 sessions, 5 days a week for 2 weeks; active exerise: NR; cold pack: 20 min, 3 times a day; drug: 2 weeks.                                                                         | SWD + active exercises + cold pack + drug. SWD: 20 min, 10 sessions, 5 days a week for 2 weeks; active exerise: NR; cold pack: 20 min, 3 times a day; drug: 2 weeks. |                  |                 |                |

| AUTHOR & YEAR     | INTERVENTION I                                                                                                                                                                                                       | INTERVENTION II | INTERVENTION III | INTERVENTION IV | INTERVENTION V |
|-------------------|----------------------------------------------------------------------------------------------------------------------------------------------------------------------------------------------------------------------|-----------------|------------------|-----------------|----------------|
|                   | MWD + hot pack + active exercises. MWD: 20 min, 15 sessions, 5 days a week for 3 weeks; hot packs: 20 min, 15 sessions, 5 days a week for 3 weeks; active exercises: 15 min, 15 sessions, 5 days a week for 3 weeks. |                 |                  |                 |                |
| Akyol 2012        |                                                                                                                                                                                                                      |                 |                  |                 |                |
| Giombini 2006     | MWD. 30 min, 12 sessions, 3 days a week for 4 weeks.                                                                                                                                                                 |                 |                  |                 |                |
| Rabini 2012       | MWD. 30 min, 12 sessions, 3 days a week for 4 weeks.                                                                                                                                                                 |                 |                  |                 |                |
|                   | CRET thermal + exercises. CRET thermal: 15 min, 9 sessions, 3 days a week for 3 weeks; exercises: 15 sessions, 5 days a week for 3 weeks.                                                                            |                 |                  |                 |                |
| Avendaño-Coy 2022 | CRET subthermal + exercises. CRET subthermal: 15 min, 9 sessions, 3 days a week for 3 weeks; exercises: 15 sessions, 5 days a week for 3 weeks.                                                                      |                 |                  |                 |                |
| Guler-Uysal 2004  | SWD + hot pack + active exercises. SWD: 20 min; hot pack: 20 min; active exercises: NR.                                                                                                                              |                 |                  |                 |                |
| Leung 2008        | SWD + stretching. SWD: 20 min; stretching: 12 sessions, 3 days a week for 4 weeks.                                                                                                                                   |                 |                  |                 |                |
|                   | MWD + SWD + hot pack + mobilization. MWD/SWD/hot pack: 15 min, 9 sessions, 3 days a week for 3 weeks; mobilization: 9 sessions, 3 days a week for 3 weeks.                                                           |                 |                  |                 |                |
| Hammad 2019       |                                                                                                                                                                                                                      |                 |                  |                 |                |

| AUTHOR & YEAR  | INTERVENTION I                                                                                                                                                                                                            | INTERVENTION II                                                               | INTERVENTION III | INTERVENTION IV | INTERVENTION V |
|----------------|---------------------------------------------------------------------------------------------------------------------------------------------------------------------------------------------------------------------------|-------------------------------------------------------------------------------|------------------|-----------------|----------------|
| Boyaci 2014    | SWD continuos. 20 min, 15 sessions, 5 days a week for 3 weeks.                                                                                                                                                            | SWD pulsed. 20 min, 15 sessions, 5 days a week for 3 weeks.                   |                  |                 |                |
| Incebiyik 2015 | SWD + hot pack + nerve gliding exercises. SWD: 15 min, 15 sessions, 5 days a week for 3 weeks; hot pack: 15 min, 15 sessions, 5 days a week for 3 weeks; nerve gliding exercises: 15 sessions, 5 days a week for 3 weeks. |                                                                               |                  |                 |                |
| Frasca 2011    | MWD. 20 min, 6 sessions, 2 days a week for 3 weeks.                                                                                                                                                                       |                                                                               |                  |                 |                |
| Cheng 2018     | MWD + acupuncture + ultrasound. MWD: 20 min, 16 sessions, once a week for 16 weeks; acupuncture: NR; ultrasound: 8 min, 16 sessions, once a week for 16 week.                                                             |                                                                               |                  |                 |                |
| Giombini 2002  | MWD. 30 min, 12 sessions, 3 days a week for 4 weeks.                                                                                                                                                                      |                                                                               |                  |                 |                |
| Dziedzic 2005  | SWD + education. 20 min, 8 sessions, 6 weeks.                                                                                                                                                                             |                                                                               |                  |                 |                |
| Ortega 2013    | MWD continuos + active exercises + TENS. 15 sessions, 5 days a week for 3 weeks.                                                                                                                                          | MWD pulsed + active exercises + TENS. 15 sessions, 5 days a week for 3 weeks. |                  |                 |                |
| Verma 2012     | SWD + active exercises. SWD:10 min, 2 weeks; active exercise NR.                                                                                                                                                          |                                                                               |                  |                 |                |

| AUTHOR & YEAR         | INTERVENTION I                                                                                                                                | INTERVENTION II                    | INTERVENTION III | INTERVENTION IV | INTERVENTION V |
|-----------------------|-----------------------------------------------------------------------------------------------------------------------------------------------|------------------------------------|------------------|-----------------|----------------|
| Albornoz-Cabello 2020 | MDR + active exercises. MDR: NR; active exercises: 10 min, 10 sessions, 5/3/2 days a weeks progressively for 3 weeks.                         |                                    |                  |                 |                |
| Gray 1995             | SWD. 10 min, 12 sessions, 3 days a week for 4 weeks.                                                                                          |                                    |                  |                 |                |
| Talaat 1986           | SWD. 20 min, 14 sessions, 7 days a week for 2 weeks.                                                                                          |                                    |                  |                 |                |
| Nakamura 2022         | CRET. 30 min, 1 session.                                                                                                                      |                                    |                  |                 |                |
| Visconti 2020         | CRET. 10 min, 1 session.                                                                                                                      |                                    |                  |                 |                |
| Livesley 1992         | SWD + standard physiotherapy. SWD: 30 min, 10 sessions; standard physiotherapy: NR.                                                           |                                    |                  |                 |                |
| Babaei-Ghazani 2019   | SWD + massage + stretching + active exercises + education. SWD: 15 min, 10 sessions; massage + stretching + active exercises + education: NR. |                                    |                  |                 |                |
| Badur 2020            | SWD. 20 min, 10 sessions, 5 days a week for 2 weeks.                                                                                          |                                    |                  |                 |                |
| Pasila 1978           | SWD diapulse. 20 min, 3 sessions.                                                                                                             | SWD curapulse. 20 min, 3 sessions. |                  |                 |                |
| Giombini 2001         | MWD. 30 min, 9 sessions, 3 days a week for 3 weeks.                                                                                           |                                    |                  |                 |                |

| AUTHOR & YEAR     | INTERVENTION I                                                                                                                                                                             | INTERVENTION II | INTERVENTION III | INTERVENTION IV | INTERVENTION V |
|-------------------|--------------------------------------------------------------------------------------------------------------------------------------------------------------------------------------------|-----------------|------------------|-----------------|----------------|
| Georgoudis 2017   | MWD + acupuncture + stretching + myofascial release. MWD: 10 min, 10 sessions; acupuncture: 20 min, 10 sessions; stretching: NR, 2-3 times daily; myofascial release: 15 min, 10 sessions. |                 |                  |                 |                |
| García-Marín 2021 | LWD + active exercises. LWD: 12 min, 10 sessions, 5 days a week for 2 weeks; active exercises: 30 min, 10 sessions, 5 days a week for 2 weeks.                                             |                 |                  |                 |                |

| AUTHOR & YEAR | CONTROL I                                                                                                                                                                                                                                     | CONTROL II                                                                                                                                                                                                                          | CONTROL III                                                                                                                                                                                                                                                                         | CONTROL IV                                                                                                                                                                                                                                                                | CONTROL V                                                                                                                                                                                                                           |
|---------------|-----------------------------------------------------------------------------------------------------------------------------------------------------------------------------------------------------------------------------------------------|-------------------------------------------------------------------------------------------------------------------------------------------------------------------------------------------------------------------------------------|-------------------------------------------------------------------------------------------------------------------------------------------------------------------------------------------------------------------------------------------------------------------------------------|---------------------------------------------------------------------------------------------------------------------------------------------------------------------------------------------------------------------------------------------------------------------------|-------------------------------------------------------------------------------------------------------------------------------------------------------------------------------------------------------------------------------------|
| Akyol 2010    | Active exercise. 12 sessions, 3 days a week for 4 weeks.                                                                                                                                                                                      |                                                                                                                                                                                                                                     |                                                                                                                                                                                                                                                                                     |                                                                                                                                                                                                                                                                           |                                                                                                                                                                                                                                     |
| Atamaz 2006   | Hyaluronic acid injection (NaHA). 4 sessions, 2 days a week for the first week (at day 0 and 7), 1 day a week for the second week (at day 14) and at 6 months.                                                                                | Hyaluronic acid injection (Hylan). 4 sessions, 2 days a week for the first week (at day 0 and 7), 1 day a week for the second week (at day 14) and at 6 months.                                                                     |                                                                                                                                                                                                                                                                                     |                                                                                                                                                                                                                                                                           |                                                                                                                                                                                                                                     |
| Atamaz 2012   | Sham TENS + active exercises + home based exercises + education. Sham TENS: 20 min, 15 sessions, 5 days a week for 3 weeks; active exercises: 9 sessions, 3 days a week for 3 weeks; home based exercises: NR; education: 60 min, 1 sessions. | TENS + active exercises + home based exercises + education. TENS: 20 min, 15 sessions, 5 days a week for 3 weeks; active exercises: 9 sessions, 3 days a week for 3 weeks; home based exercises: NR; education: 60 min, 1 sessions. | Sham interferential currents + active exercises + home based exercises + education. Sham interferential currents: 20 min, 15 sessions, 5 days a week for 3 weeks; active exercises: 9 sessions, 3 days a week for 3 weeks; home based exercises: NR; education: 60 min, 1 sessions. | Interferential currents + active exercises + home based exercises + education. Interferential currents: 20 min, 15 sessions, 5 days a week for 3 weeks; active exercises: 9 sessions, 3 days a week for 3 weeks; home based exercises: NR; education: 60 min, 1 sessions. | Sham SWD + active exercises + home based exercises + education. Sham SWD: 15 sessions, 5 days a week for 3 weeks; active exercises: 9 sessions, 3 days a week for 3 weeks; home based exercises: NR; education: 60 min, 1 sessions. |
| Bezalel 2010  | Active exercises + education. 45 min, 4 sessions, once a week for 4 weeks.                                                                                                                                                                    |                                                                                                                                                                                                                                     |                                                                                                                                                                                                                                                                                     |                                                                                                                                                                                                                                                                           |                                                                                                                                                                                                                                     |

| AUTHOR & YEAR    | CONTROL I                                                                                                                                                 | CONTROL II                                                                                                                                                            | CONTROL III                                                          | CONTROL IV | CONTROL V |
|------------------|-----------------------------------------------------------------------------------------------------------------------------------------------------------|-----------------------------------------------------------------------------------------------------------------------------------------------------------------------|----------------------------------------------------------------------|------------|-----------|
| Boyaci 2013      | Ultrasound. 8 min each knee, 10 sessions, 5 days a week for 2 weeks.                                                                                      | Phonophoresis (ketoprofen) [ultrasound + topical application of ketoprofen to enhance absorption]. 8 min each knee, 10 sessions, 5 days a week for 2 weeks.           |                                                                      |            |           |
| Callaghan 2005   | Sham SWD. 20 min, 6 sessions, 3 days a week for 2 weeks.                                                                                                  |                                                                                                                                                                       |                                                                      |            |           |
| Cantarini 2006   | Mud pack + hot water baths. Mud pack: 20 min, 15 sessions, for 3 weeks; hot water baths: 15 min, 15 sessions, for 3 weeks.                                | Regular routine ambulatory care. NR.                                                                                                                                  |                                                                      |            |           |
| Cetin 2008       | TENS + hot pack + active exercises. TENS: 20 min, 24 sessions, 3 days a week for 8 weeks; hot packs and exercise: 24 sessions, 3 days a week for 8 weeks. | Ultrasound + hot pack + active exercises. Ultrasound: 10 min, 24 sessions, 3 days a week for 8 weeks; hot packs and exercise: 24 sessions, 3 days a week for 8 weeks. | Hot pack + active exercises. 24 sessions, 3 days a week for 8 weeks. |            |           |
| Chamberlain 1982 | Active exercises. 6 sessions, 3 days a week for 2 weeks, then exercise at home.                                                                           |                                                                                                                                                                       |                                                                      |            |           |
| Clarke 1974      | Ice. 9 sessions, 3 days a week for 3 weeks.                                                                                                               | Sham SWD. 9 sessions, 3 days a week for 3 weeks.                                                                                                                      |                                                                      |            |           |
| Fukuda 2011      | No treatment                                                                                                                                              | Sham SWD. 19 min, 9 sessions, 3 days a week for 3 weeks.                                                                                                              |                                                                      |            |           |
| Fukuda 2008      | No treatment                                                                                                                                              | Sham SWD. 19 min, 9 sessions, 3 days a week for 3 weeks.                                                                                                              |                                                                      |            |           |



| AUTHOR & YEAR            | CONTROL I                                                                                                                                                                                     | CONTROL II                                                                                                                                                                             | CONTROL III                                                                                                                                                          | CONTROL IV                                                                                                                                                             | CONTROL V |
|--------------------------|-----------------------------------------------------------------------------------------------------------------------------------------------------------------------------------------------|----------------------------------------------------------------------------------------------------------------------------------------------------------------------------------------|----------------------------------------------------------------------------------------------------------------------------------------------------------------------|------------------------------------------------------------------------------------------------------------------------------------------------------------------------|-----------|
| Gomes 2020               | Active exercises. 90 min, 24 sessions, 3 days a week for 8 weeks.                                                                                                                             | Interferential currents + active exercises. Interferential currents: 40 min, 24 sessions, 3 days a week for 8 weeks; active exercises: 90 min, 24 sessions, 3 days a week for 8 weeks. | Photobiomodulation + active exercises. Photobiomodulation: 24 sessions, 3 days a week for 8 weeks; active exercises: 90 min, 24 sessions, 3 days a week for 8 weeks. | Sham ultrasound + active exercises. Sham ultrasound: 20 min, 24 sessions, 3 days a week for 8 weeks; active exercises: 90 min, 24 sessions, 3 days a week for 8 weeks. |           |
| İşik 2020                | Sham SWD + Injection + home based active excrcises. Sham SWD and injection: 20 min, 3 sessions, once a week for 3 weeks; home-based exercise: 40 min, 36 sessions, 6 days a week for 6 weeks. |                                                                                                                                                                                        |                                                                                                                                                                      |                                                                                                                                                                        |           |
| Jia 2022                 | Ultrasound. 20 min, 12 sessions, once a day.                                                                                                                                                  |                                                                                                                                                                                        |                                                                                                                                                                      |                                                                                                                                                                        |           |
| Klaber Moffett 1996/1994 | No treatment                                                                                                                                                                                  | Sham SWD. 15 min, 9 sessions, 3 days a week for 3 weeks.                                                                                                                               |                                                                                                                                                                      |                                                                                                                                                                        |           |
| Ovanessian 2008          | No treatment                                                                                                                                                                                  |                                                                                                                                                                                        |                                                                                                                                                                      |                                                                                                                                                                        |           |
| Rattanachaiyanont 2008   | Sham SWD + active exercises + education. Sham SWD: 20 min, 9 sessions, 3 days a week for 3 weeks. Active exercise and education: NR.                                                          |                                                                                                                                                                                        |                                                                                                                                                                      |                                                                                                                                                                        |           |

| AUTHOR & YEAR | CONTROL I                                                                                                                                                                                                                       | CONTROL II                                                                                                                                   | CONTROL III | CONTROL IV | CONTROL V |
|---------------|---------------------------------------------------------------------------------------------------------------------------------------------------------------------------------------------------------------------------------|----------------------------------------------------------------------------------------------------------------------------------------------|-------------|------------|-----------|
|               | <p>Ultrasound + education + active exercises + TENS + hot pack.</p> <p>Ultrasound: 5 min, 10 sessions, 5 days a week for 2 weeks;</p>                                                                                           |                                                                                                                                              |             |            |           |
| Terzi 2017    | <p>education: NR; active exercises: 84 at home sessions, 14 times a week (twice a day) for 6 weeks;</p> <p>TENS: 20 min, 10 sessions, 5 days a week for 2 weeks; hot packs: 20 min, 10 sessions, 5 days a week for 2 weeks.</p> | <p>Education + active exercises.</p> <p>Education: NR; active exercises: 84 at home sessions, 14 times a week (twice a day) for 6 weeks.</p> |             |            |           |
| Teslim 2013   |                                                                                                                                                                                                                                 |                                                                                                                                              |             |            |           |
| Tüzün 2003    |                                                                                                                                                                                                                                 |                                                                                                                                              |             |            |           |
| Wright 1964   | Placebo tablets (twice a day). NR.                                                                                                                                                                                              | 4 Placebo injections. NR.                                                                                                                    |             |            |           |

| AUTHOR & YEAR | CONTROL I                                                                                                                                                          | CONTROL II                                                                                                                                                          | CONTROL III | CONTROL IV | CONTROL V |
|---------------|--------------------------------------------------------------------------------------------------------------------------------------------------------------------|---------------------------------------------------------------------------------------------------------------------------------------------------------------------|-------------|------------|-----------|
| Giombini 2010 | Sham MWD. 30 min, 12 sessions, 3 days a week for 4 weeks.                                                                                                          |                                                                                                                                                                     |             |            |           |
| Rabini 2012   | Superficial heat therapy. 30 min, 12 sessions, 3 days a week for 4 weeks.                                                                                          |                                                                                                                                                                     |             |            |           |
| Alcidi 2007   | TENS. 20 min, 5 sessions, 5 days for 1 weeks.                                                                                                                      |                                                                                                                                                                     |             |            |           |
| Cocetta 2018  | Sham CRET. 20 min (5 min of detuned capacitive, 10 min of detuned resistive, 5 min of detuned capacitive), 6 sessions, 3 days a week for 2 weeks.                  |                                                                                                                                                                     |             |            |           |
| Kumaran 2019  | Home based exercise + education. 3 sessions in 4 weeks.                                                                                                            | Sham CRET + home based exercises + education. Sham CRET: 15 minutes, 8 sessions, 2 days a week for 4 weeks; home based exercise + education: 3 sessions in 4 weeks. |             |            |           |
| Ahmed 2009    | Sham SWD + drug + active exercises + education. Sham SWD: 15 min, 18 sessions, 3 days a week for 6 weeks; drug: 7 days a week; active exercise: NR; education: NR. |                                                                                                                                                                     |             |            |           |
| Ansari 2022   | Massage. 20 min, 10 sessions, on alternate days for 3 weeks.                                                                                                       |                                                                                                                                                                     |             |            |           |
| Gibson 1985   | Mobilisation. 4 sessions, once a week for 4 weeks.                                                                                                                 | Sham SWD. 12 sessions, 3 days a week for 4 weeks.                                                                                                                   |             |            |           |

| AUTHOR & YEAR   | CONTROL I                                                                                                                                                                                                                      | CONTROL II | CONTROL III | CONTROL IV | CONTROL V |
|-----------------|--------------------------------------------------------------------------------------------------------------------------------------------------------------------------------------------------------------------------------|------------|-------------|------------|-----------|
| Igatpurkar 2013 | Mobilisation + hot pack + active exercises. 4 weeks of treatment.                                                                                                                                                              |            |             |            |           |
| Kumar 2009      | Active exercises. 4 sessions, once a week for 4 weeks.                                                                                                                                                                         |            |             |            |           |
| Kumar 2009a     | Active exercises. 4 sessions, once a week for 4 weeks.                                                                                                                                                                         |            |             |            |           |
| Shakoor 2008    | Sham SWD + drug + active exercises + education. Sham SWD: 15 min, 18 sessions, 3 days a week for 6 weeks; drug: twice a day 7 days a week; active exercise: 84 sessions, twice a day 7 days a week for 6 weeks; education: NR. |            |             |            |           |
| Durmus 2014     | Active exercises. 60 min, 3 days a week for 6 weeks.                                                                                                                                                                           |            |             |            |           |

| AUTHOR & YEAR       | CONTROL I                                                                                                                                                                                                                                                                 | CONTROL II | CONTROL III                                                                                                                                                                     | CONTROL IV | CONTROL V |
|---------------------|---------------------------------------------------------------------------------------------------------------------------------------------------------------------------------------------------------------------------------------------------------------------------|------------|---------------------------------------------------------------------------------------------------------------------------------------------------------------------------------|------------|-----------|
|                     |                                                                                                                                                                                                                                                                           |            |                                                                                                                                                                                 |            |           |
| Farrell 1982        | Mobilisation. 9 sessions, 3 days a week for 3 weeks.                                                                                                                                                                                                                      |            |                                                                                                                                                                                 |            |           |
| Notarnicola 2017    | Laser therapy. 10 sessions, 5 days a week for 2 weeks.                                                                                                                                                                                                                    |            |                                                                                                                                                                                 |            |           |
| Wachi 2022          | Sham CRET. NR.                                                                                                                                                                                                                                                            |            |                                                                                                                                                                                 |            |           |
| Zati 2018           |                                                                                                                                                                                                                                                                           |            |                                                                                                                                                                                 |            |           |
| Jiménez-Garcia 2008 | Ultrasound + iontophoresis with acetic acid + active exercises.<br>Ultrasound: 5 min, 15 sessions, 5 days a week for 3 weeks;<br>iontophoresis with acetic acid: 15 min, 15 sessions, 5 days a week for 3 weeks; active exercise: 15 sessions, 5 days a week for 3 weeks. |            |                                                                                                                                                                                 |            |           |
| Yilmaz 2018         | Sham SWD + active exercises + cold pack + drug. Sham SWD: 20 min, 10 sessions, 5 days a week for 2 weeks; active exercise: NR; cold pack: 20 min, 3 times a day; drug: 2 weeks.                                                                                           |            | Sham SWD + active exercises + cold pack + drug. Sham SWD: 20 min, 10 sessions, 5 days a week for 2 weeks; active exercise: NR; cold pack: 20 min, 3 times a day; drug: 2 weeks. |            |           |

| AUTHOR & YEAR     | CONTROL I                                                                                                                                                                                                                      | CONTROL II                                                                   | CONTROL III | CONTROL IV | CONTROL V |
|-------------------|--------------------------------------------------------------------------------------------------------------------------------------------------------------------------------------------------------------------------------|------------------------------------------------------------------------------|-------------|------------|-----------|
| Akyol 2012        | Sham MWD + hot pack + active exercises. Sham MWD: 20 min, 15 sessions, 5 days a week for 3 weeks; hot packs: 20 min, 15 sessions, 5 days a week for 3 weeks; active exercises: 15 min, 15 sessions, 5 days a week for 3 weeks. |                                                                              |             |            |           |
| Giombini 2006     | Ultrasound. 15 min, 12 sessions, 3 days a week for 4 weeks.                                                                                                                                                                    | Active exercises. 5 min twice a day, 56 sessions, 7 days a week for 4 weeks. |             |            |           |
| Rabini 2012       | Local injections. 3 sessions, 1 injection every 2 weeks.                                                                                                                                                                       |                                                                              |             |            |           |
| Avendaño-Coy 2022 | Sham SCRET + exercises. Sham CRET: 15 min, 9 sessions, 3 days a week for 3 weeks; exercises: 15 sessions, 5 days a week for 3 weeks.                                                                                           |                                                                              |             |            |           |
| Guler-Uysal 2004  | Mobilization + active exercises. Mobilization: NR; active exercises: NR.                                                                                                                                                       |                                                                              |             |            |           |
| Leung 2008        | Hot pack + stretching. Hot pack: 20 min; stretching: 12 sessions, 3 days a week for 4 weeks.                                                                                                                                   | Stretching: 12 sessions, 3 days a week for 4 weeks.                          |             |            |           |
| Hammad 2019       | Mobilization: 9 sessions, 3 days a week for 3 weeks.                                                                                                                                                                           |                                                                              |             |            |           |

| AUTHOR & YEAR  | CONTROL I                                                                                                                                                                                                                           | CONTROL II                                               | CONTROL III | CONTROL IV | CONTROL V |
|----------------|-------------------------------------------------------------------------------------------------------------------------------------------------------------------------------------------------------------------------------------|----------------------------------------------------------|-------------|------------|-----------|
| Boyaci 2014    | Sham SWD. 20 min, 15 sessions, 5 days a week for 3 weeks.                                                                                                                                                                           |                                                          |             |            |           |
| Incebiyik 2015 | Sham SWD + hot pack + nerve gliding exercises. Sham SWD: 15 min, 15 sessions, 5 days a week for 3 weeks; hot pack: 15 min, 15 sessions, 5 days a week for 3 weeks; nerve gliding exercises: 15 sessions, 5 days a week for 3 weeks. |                                                          |             |            |           |
|                |                                                                                                                                                                                                                                     |                                                          |             |            |           |
| Frasca 2011    | Sham MWD. 20 min, 6 sessions, 2 days a week for 3 weeks.                                                                                                                                                                            |                                                          |             |            |           |
| Cheng 2018     |                                                                                                                                                                                                                                     |                                                          |             |            |           |
|                | ESWT (extracorporeal shock wave therapy): 16 sessions, once a week for 16 weeks.                                                                                                                                                    |                                                          |             |            |           |
| Giombini 2002  | Ultrasound. 15 min, 12 sessions, 3 days a week for 4 weeks.                                                                                                                                                                         |                                                          |             |            |           |
| Dziedzic 2005  | Active exercise + education. 20 min, 8 sessions, 6 weeks.                                                                                                                                                                           | Manual therapy + education. 20 min, 8 sessions, 6 weeks. |             |            |           |
| Ortega 2013    | Sham MWD + active exercises + TENS. 15 sessions, 5 days a week for 3 weeks.                                                                                                                                                         |                                                          |             |            |           |
| Verma 2012     | Taping + active exercises. Taping: 2 weeks on alternate days; active exercise: NR.                                                                                                                                                  |                                                          |             |            |           |

| AUTHOR & YEAR         | CONTROL I                                                                                                                                               | CONTROL II                                                 | CONTROL III                                           | CONTROL IV                                              | CONTROL V |
|-----------------------|---------------------------------------------------------------------------------------------------------------------------------------------------------|------------------------------------------------------------|-------------------------------------------------------|---------------------------------------------------------|-----------|
| Albornoz-Cabello 2020 | Active exercises. 10 min, 10 sessions, 5/3/2 days a weeks progressively for 3 weeks.                                                                    |                                                            |                                                       |                                                         |           |
| Gray 1995             | Megapulse. 20 min, 12 sessions, 3 days a week for 4 weeks.                                                                                              | Ultrasound. 2 min, 12 sessions, 3 days a week for 4 weeks. | Laser. 3 min, 12 sessions, 3 days a week for 4 weeks. | Sham treatment. 12 sessions, 3 days a week for 4 weeks. |           |
| Talaat 1986           | Drug. 7 tablets, once a day for 1 week.                                                                                                                 | Ultrasound. 5 min, 14 sessions, 7 days a week for 2 weeks. |                                                       |                                                         |           |
| Nakamura 2022         | No intervention.                                                                                                                                        |                                                            |                                                       |                                                         |           |
| Visconti 2020         | Massage. 10 min.                                                                                                                                        | Sham CRET. 10 min.                                         |                                                       |                                                         |           |
| Livesley 1992         | Sham SWD + standard physiotherapy. NR.                                                                                                                  |                                                            |                                                       |                                                         |           |
| Babaei-Ghazani 2019   | Sham SWD + massage + stretching + active exercises + education. Sham SWD: 15 min, 10 sessions; massage + stretching + active exercises + education: NR. |                                                            |                                                       |                                                         |           |
| Badur 2020            | Sham SWD. 20 min, 10 sessions, 5 days a week for 2 weeks.                                                                                               |                                                            |                                                       |                                                         |           |
| Pasila 1978           | Sham SWD. NR.                                                                                                                                           |                                                            |                                                       |                                                         |           |
| Giombini 2001         | Ultrasound. 15 min, 9 sessions, 3 days a week for 3 weeks.                                                                                              |                                                            |                                                       |                                                         |           |



| AUTHOR & YEAR     | CONTROL I                                                                                          | CONTROL II                                                                                                                                                  | CONTROL III | CONTROL IV | CONTROL V |
|-------------------|----------------------------------------------------------------------------------------------------|-------------------------------------------------------------------------------------------------------------------------------------------------------------|-------------|------------|-----------|
| Georgoudis 2017   | Acupuncture + stretching.<br>Acupuncture: 20 min, 10 sessions;<br>stretching: NR, 2-3 times daily. |                                                                                                                                                             |             |            |           |
| García-Marín 2021 | Active exercises. 30 min, 10 sessions, 5 days a week for 2 weeks.                                  | Sham LWD + active exercises.<br>Sham LWD: 12 min, 10 sessions, 5 days a week for 2 weeks; active exercises: 30 min, 10 sessions, 5 days a week for 2 weeks. |             |            |           |

| AUTHOR & YEAR | PARTICIPANTS  |                |              |                |               | PARTICIPANTS  |                |                 |          |               |
|---------------|---------------|----------------|--------------|----------------|---------------|---------------|----------------|-----------------|----------|---------------|
|               | PARTICIPANTS  | PARTICIPANTS   | INTERVENTION | PARTICIPANTS   | PARTICIPANTS  | PARTICIPANTS  | PARTICIPANTS   | PARTICIPANTS    | CONTROL  | PARTICIPANTS  |
|               | INTERVENTION  | INTERVENTION   | GROUP III    | INTERVENTION   | INTERVENTION  | CONTROL       | CONTROL        | CONTROL         | GROUP IV | CONTROL       |
|               | GROUP I (M:F) | GROUP II (M:F) | (M:F)        | GROUP IV (M:F) | GROUP V (M:F) | GROUP I (M:F) | GROUP II (M:F) | GROUP III (M:F) | (M:F)    | GROUP V (M:F) |
| Akyol 2010    | 20:0          |                |              |                | 20:0          |               |                |                 |          |               |
| Atamaz 2006   | 6:34          |                |              |                | 2:18          | 5:15          |                |                 |          |               |
| Atamaz 2012   | 4:27          |                |              |                | 10:27         | 6:31          | 7:28           | 4:27            | 5:27     |               |
| Bezalel 2010  | 5:20          |                |              |                | 8:17          |               |                |                 |          |               |

| AUTHOR & YEAR    | PARTICIPANTS  |                |              |                |               | PARTICIPANTS  |                |                 |          |               |
|------------------|---------------|----------------|--------------|----------------|---------------|---------------|----------------|-----------------|----------|---------------|
|                  | PARTICIPANTS  | PARTICIPANTS   | INTERVENTION | PARTICIPANTS   | PARTICIPANTS  | PARTICIPANTS  | PARTICIPANTS   | PARTICIPANTS    | CONTROL  | PARTICIPANTS  |
|                  | INTERVENTION  | INTERVENTION   | GROUP III    | INTERVENTION   | INTERVENTION  | CONTROL       | CONTROL        | CONTROL         | GROUP IV | CONTROL       |
|                  | GROUP I (M:F) | GROUP II (M:F) | (M:F)        | GROUP IV (M:F) | GROUP V (M:F) | GROUP I (M:F) | GROUP II (M:F) | GROUP III (M:F) | (M:F)    | GROUP V (M:F) |
| Boyaci 2013      | 0:35          |                |              |                |               | 0:33          | 0:33           |                 |          |               |
| Callaghan 2005   | 5:4           | 4:5            |              |                |               | 5:4           |                |                 |          |               |
| Cantarini 2006   | 8:16          |                |              |                |               | 13:17         | 6:14           |                 |          |               |
| Cetin 2008       | 0:20          |                |              |                |               | 0:20          | 0:20           | 0:20            |          |               |
| Chamberlain 1982 | 6:16          |                |              |                |               | 4:16          |                |                 |          |               |
| Clarke 1974      | 6:11          |                |              |                |               | 4:11          | 4:9            |                 |          |               |
| Fukuda 2011      | 0:31          | 0:32           |              |                |               | 0:35          | 0:23           |                 |          |               |
| Fukuda 2008      | 24 (M:F NR)   | 22 (M:F NR)    |              |                |               | 18 (M:F NR)   | 20 (M:F NR)    |                 |          |               |

| AUTHOR & YEAR            | PARTICIPANTS  |                |              |                |               | PARTICIPANTS  |                |                 |          |               |
|--------------------------|---------------|----------------|--------------|----------------|---------------|---------------|----------------|-----------------|----------|---------------|
|                          | PARTICIPANTS  | PARTICIPANTS   | INTERVENTION | PARTICIPANTS   | PARTICIPANTS  | PARTICIPANTS  | PARTICIPANTS   | PARTICIPANTS    | CONTROL  | PARTICIPANTS  |
|                          | INTERVENTION  | INTERVENTION   | GROUP III    | INTERVENTION   | INTERVENTION  | CONTROL       | CONTROL        | CONTROL         | GROUP IV | CONTROL       |
|                          | GROUP I (M:F) | GROUP II (M:F) | (M:F)        | GROUP IV (M:F) | GROUP V (M:F) | GROUP I (M:F) | GROUP II (M:F) | GROUP III (M:F) | (M:F)    | GROUP V (M:F) |
|                          |               |                |              |                |               |               |                |                 |          |               |
| Gomes 2020               | 1:19          |                |              |                |               | 3:17          | 2:18           | 0:20            | 2:18     |               |
|                          |               |                |              |                |               |               |                |                 |          |               |
| Işık 2020                | 14:17         |                |              |                |               | 13:19         |                |                 |          |               |
| Jia 2022                 | 12:45         |                |              |                |               | 15:42         |                |                 |          |               |
|                          |               |                |              |                |               |               |                |                 |          |               |
| Klaber Moffett 1996/1994 | 34:58         |                |              |                |               | 34:58         | 34:58          |                 |          |               |
|                          |               |                |              |                |               |               |                |                 |          |               |
| Ovanessian 2008          | 14 (M:F NR)   | 14 (M:F NR)    |              |                |               | 14 (M:F NR)   |                |                 |          |               |
|                          |               |                |              |                |               |               |                |                 |          |               |
| Rattanachaiyanont 2008   | 0:53          |                |              |                |               | 0:60          |                |                 |          |               |

|               | PARTICIPANTS  |                |              |                |               | PARTICIPANTS  |                |                 |          |               |
|---------------|---------------|----------------|--------------|----------------|---------------|---------------|----------------|-----------------|----------|---------------|
|               | PARTICIPANTS  | PARTICIPANTS   | INTERVENTION | PARTICIPANTS   | PARTICIPANTS  | PARTICIPANTS  | PARTICIPANTS   | PARTICIPANTS    | CONTROL  | PARTICIPANTS  |
|               | INTERVENTION  | INTERVENTION   | GROUP III    | INTERVENTION   | INTERVENTION  | CONTROL       | CONTROL        | CONTROL         | GROUP IV | CONTROL       |
| AUTHOR & YEAR | GROUP I (M:F) | GROUP II (M:F) | (M:F)        | GROUP IV (M:F) | GROUP V (M:F) | GROUP I (M:F) | GROUP II (M:F) | GROUP III (M:F) | (M:F)    | GROUP V (M:F) |
|               |               |                |              |                |               |               |                |                 |          |               |
| Terzi 2017    | 13:25         |                |              |                |               | 13:26         |                | 11:19           |          |               |
|               |               |                |              |                |               |               |                |                 |          |               |
| Teslim 2013   | 12 (M:F NR)   | 12 (M:F NR)    |              |                |               |               |                |                 |          |               |
|               |               |                |              |                |               |               |                |                 |          |               |
| Tüzün 2003    | 7:13          | 7:13           |              |                |               |               |                |                 |          |               |
|               |               |                |              |                |               |               |                |                 |          |               |
| Wright 1964   | 1:12          |                |              |                |               | 0:13          |                | 2:10            |          |               |

| AUTHOR & YEAR | PARTICIPANTS  |                |              |                |               | PARTICIPANTS  |                |                 |          |               |
|---------------|---------------|----------------|--------------|----------------|---------------|---------------|----------------|-----------------|----------|---------------|
|               | PARTICIPANTS  | PARTICIPANTS   | INTERVENTION | PARTICIPANTS   | PARTICIPANTS  | PARTICIPANTS  | PARTICIPANTS   | PARTICIPANTS    | CONTROL  | PARTICIPANTS  |
|               | INTERVENTION  | INTERVENTION   | GROUP III    | INTERVENTION   | INTERVENTION  | CONTROL       | CONTROL        | CONTROL         | GROUP IV | CONTROL       |
|               | GROUP I (M:F) | GROUP II (M:F) | (M:F)        | GROUP IV (M:F) | GROUP V (M:F) | GROUP I (M:F) | GROUP II (M:F) | GROUP III (M:F) | (M:F)    | GROUP V (M:F) |
| Giombini 2010 | 12:23         |                |              |                |               | 9:19          |                |                 |          |               |
| Rabini 2012   | 4:23          |                |              |                |               | 5:22          |                |                 |          |               |
| Alcidi 2007   | 2:18          |                |              |                |               | 4:16          |                |                 |          |               |
| Cocetta 2018  | 6:25          |                |              |                |               | 0:22          |                |                 |          |               |
| Kumaran 2019  | 6:9           |                |              |                |               | 6:9           | 6:9            |                 |          |               |
| Ahmed 2009    | 64:46         |                |              |                |               | 64:46         |                |                 |          |               |
| Ansari 2022   | 24 (M:F NR)   |                |              |                |               | 24 (M:F NR)   |                |                 |          |               |
| Gibson 1985   | 18:16         |                |              |                |               | 20:21         | 23:11          |                 |          |               |

| AUTHOR & YEAR   | PARTICIPANTS  |                |              |                |               | PARTICIPANTS  |                |                 |          |               |
|-----------------|---------------|----------------|--------------|----------------|---------------|---------------|----------------|-----------------|----------|---------------|
|                 | PARTICIPANTS  | PARTICIPANTS   | INTERVENTION | PARTICIPANTS   | PARTICIPANTS  | PARTICIPANTS  | PARTICIPANTS   | PARTICIPANTS    | CONTROL  | PARTICIPANTS  |
|                 | INTERVENTION  | INTERVENTION   | GROUP III    | INTERVENTION   | INTERVENTION  | CONTROL       | CONTROL        | CONTROL         | GROUP IV | CONTROL       |
|                 | GROUP I (M:F) | GROUP II (M:F) | (M:F)        | GROUP IV (M:F) | GROUP V (M:F) | GROUP I (M:F) | GROUP II (M:F) | GROUP III (M:F) | (M:F)    | GROUP V (M:F) |
| Igatpurkar 2013 | 7:13          |                |              |                |               | 6:14          |                |                 |          |               |
| Kumar 2009      | 15:0          |                |              |                |               | 15:0          |                |                 |          |               |
| Kumar 2009a     | 51:0          |                |              |                |               | 51:0          |                |                 |          |               |
| Shakoor 2008    | 42:60         |                |              |                |               | 42:60         |                |                 |          |               |
| Durmus 2014     | 0:19          |                |              |                |               | 0:20          |                |                 |          |               |

| AUTHOR & YEAR       | PARTICIPANTS INTERVENTION GROUP I (M:F) | PARTICIPANTS INTERVENTION GROUP II (M:F) | PARTICIPANTS INTERVENTION GROUP III (M:F) | PARTICIPANTS INTERVENTION GROUP IV (M:F) | PARTICIPANTS INTERVENTION GROUP V (M:F) | PARTICIPANTS CONTROL GROUP I (M:F) | PARTICIPANTS CONTROL GROUP II (M:F) | PARTICIPANTS CONTROL GROUP III (M:F) | PARTICIPANTS CONTROL GROUP IV (M:F) | PARTICIPANTS CONTROL GROUP V (M:F) |
|---------------------|-----------------------------------------|------------------------------------------|-------------------------------------------|------------------------------------------|-----------------------------------------|------------------------------------|-------------------------------------|--------------------------------------|-------------------------------------|------------------------------------|
|                     |                                         |                                          |                                           |                                          |                                         |                                    |                                     |                                      |                                     |                                    |
| Farrell 1982        | 14:10                                   |                                          |                                           |                                          |                                         | 16:8                               |                                     |                                      |                                     |                                    |
| Notarnicola 2017    | 17:43                                   |                                          |                                           |                                          |                                         | 17:43                              |                                     |                                      |                                     |                                    |
| Wachi 2022          | 15:0                                    |                                          |                                           |                                          |                                         | 15:0                               |                                     |                                      |                                     |                                    |
| Zati 2018           | 10:14                                   | 13:12                                    |                                           |                                          |                                         |                                    |                                     |                                      |                                     |                                    |
| Jiménez-García 2008 | 2:10                                    |                                          |                                           |                                          |                                         | 1:10                               |                                     |                                      |                                     |                                    |
| Yilmaz 2018         | 5:9                                     | 4:10                                     |                                           |                                          |                                         | 0:15                               | 4:10                                |                                      |                                     |                                    |



| AUTHOR & YEAR     | PARTICIPANTS  |                |              |                |               | PARTICIPANTS  |                |                 |          |               |
|-------------------|---------------|----------------|--------------|----------------|---------------|---------------|----------------|-----------------|----------|---------------|
|                   | PARTICIPANTS  | PARTICIPANTS   | INTERVENTION | PARTICIPANTS   | PARTICIPANTS  | PARTICIPANTS  | PARTICIPANTS   | PARTICIPANTS    | CONTROL  | PARTICIPANTS  |
|                   | INTERVENTION  | INTERVENTION   | GROUP III    | INTERVENTION   | INTERVENTION  | CONTROL       | CONTROL        | CONTROL         | GROUP IV | CONTROL       |
|                   | GROUP I (M:F) | GROUP II (M:F) | (M:F)        | GROUP IV (M:F) | GROUP V (M:F) | GROUP I (M:F) | GROUP II (M:F) | GROUP III (M:F) | (M:F)    | GROUP V (M:F) |
|                   |               |                |              |                |               |               |                |                 |          |               |
| Akyol 2012        | 15:5          |                |              |                |               | 15:5          |                |                 |          |               |
| Giombini 2006     | 12:2          |                |              |                |               | 8:4           | 9:2            |                 |          |               |
| Rabini 2012       | 16:30         |                |              |                |               | 15:31         |                |                 |          |               |
|                   |               |                |              |                |               |               |                |                 |          |               |
| Avendaño-Coy 2022 | 10:17         | 10:17          |              |                |               | 9:18          |                |                 |          |               |
| Guler-Uysal 2004  | 7:13          |                |              |                |               | 5:15          |                |                 |          |               |
|                   |               |                |              |                |               |               |                |                 |          |               |
| Leung 2008        | 5:5           |                |              |                |               | 8:2           | 8:2            |                 |          |               |
|                   |               |                |              |                |               |               |                |                 |          |               |
| Hammad 2019       | 7:8           |                |              |                |               | 8:7           |                |                 |          |               |

| AUTHOR & YEAR  | PARTICIPANTS  |                |              |                |               | PARTICIPANTS  |                |                 |          |               |
|----------------|---------------|----------------|--------------|----------------|---------------|---------------|----------------|-----------------|----------|---------------|
|                | PARTICIPANTS  | PARTICIPANTS   | INTERVENTION | PARTICIPANTS   | PARTICIPANTS  | PARTICIPANTS  | PARTICIPANTS   | PARTICIPANTS    | CONTROL  | PARTICIPANTS  |
|                | INTERVENTION  | INTERVENTION   | GROUP III    | INTERVENTION   | INTERVENTION  | CONTROL       | CONTROL        | CONTROL         | GROUP IV | CONTROL       |
|                | GROUP I (M:F) | GROUP II (M:F) | (M:F)        | GROUP IV (M:F) | GROUP V (M:F) | GROUP I (M:F) | GROUP II (M:F) | GROUP III (M:F) | (M:F)    | GROUP V (M:F) |
| Boyaci 2014    | 2:8           | 1:9            |              |                |               | 1:9           |                |                 |          |               |
|                |               |                |              |                |               |               |                |                 |          |               |
|                |               |                |              |                |               |               |                |                 |          |               |
| Incebiyik 2015 | 0:15          |                |              |                |               | 0:13          |                |                 |          |               |
| Frasca 2011    | 2:9           |                |              |                |               | 1:10          |                |                 |          |               |
|                |               |                |              |                |               |               |                |                 |          |               |
| Cheng 2018     | 13:12         |                |              |                |               | 12:14         |                |                 |          |               |
| Giombini 2002  | 33:11         |                |              |                |               | 33:11         |                |                 |          |               |
| Dziedzic 2005  | 40:81         |                |              |                |               | 52:63         | 37:77          |                 |          |               |
|                |               |                |              |                |               |               |                |                 |          |               |
| Ortega 2013    | 13:37         | 10:38          |              |                |               | 13:38         |                |                 |          |               |
| Verma 2012     | 10 (M:F NR)   |                |              |                |               | 10 (M:F NR)   |                |                 |          |               |

| AUTHOR & YEAR         | PARTICIPANTS  |                |              |                |               | PARTICIPANTS  |                |                 |          |               |
|-----------------------|---------------|----------------|--------------|----------------|---------------|---------------|----------------|-----------------|----------|---------------|
|                       | PARTICIPANTS  | PARTICIPANTS   | INTERVENTION | PARTICIPANTS   | PARTICIPANTS  | PARTICIPANTS  | PARTICIPANTS   | PARTICIPANTS    | CONTROL  | PARTICIPANTS  |
|                       | INTERVENTION  | INTERVENTION   | GROUP III    | INTERVENTION   | INTERVENTION  | CONTROL       | CONTROL        | CONTROL         | GROUP IV | CONTROL       |
|                       | GROUP I (M:F) | GROUP II (M:F) | (M:F)        | GROUP IV (M:F) | GROUP V (M:F) | GROUP I (M:F) | GROUP II (M:F) | GROUP III (M:F) | (M:F)    | GROUP V (M:F) |
| Albornoz-Cabello 2020 | 32:52         |                |              |                |               | 32:52         |                |                 |          |               |
| Gray 1995             | 1:6           |                |              |                |               | 1:6           | 1:6            | 1:6             | 1:6      |               |
| Talaat 1986           | 76:44         |                |              |                |               | 76:44         | 76:44          |                 |          |               |
| Nakamura 2022         | 15:0          |                |              |                |               | 13:0          |                |                 |          |               |
| Visconti 2020         | 55:0          |                |              |                |               | 55:0          | 55:0           |                 |          |               |
| Livesley 1992         | 5:17          |                |              |                |               | 6:20          |                |                 |          |               |
| Babaei-Ghazani 2019   | 8:17          |                |              |                |               | 12:13         |                |                 |          |               |
| Badur 2020            | 29:32         |                |              |                |               | 29:32         |                |                 |          |               |
| Pasila 1978           | 50:50         | 51:49          |              |                |               | 51:49         |                |                 |          |               |
| Giombini 2001         | 29:11         |                |              |                |               | 29:11         |                |                 |          |               |

| AUTHOR & YEAR     | PARTICIPANTS  |                |              |                |               | PARTICIPANTS  |                |                 |          |               |
|-------------------|---------------|----------------|--------------|----------------|---------------|---------------|----------------|-----------------|----------|---------------|
|                   | PARTICIPANTS  | PARTICIPANTS   | INTERVENTION | PARTICIPANTS   | PARTICIPANTS  | PARTICIPANTS  | PARTICIPANTS   | PARTICIPANTS    | CONTROL  | PARTICIPANTS  |
|                   | INTERVENTION  | INTERVENTION   | GROUP III    | INTERVENTION   | INTERVENTION  | CONTROL       | CONTROL        | CONTROL         | GROUP IV | CONTROL       |
|                   | GROUP I (M:F) | GROUP II (M:F) | (M:F)        | GROUP IV (M:F) | GROUP V (M:F) | GROUP I (M:F) | GROUP II (M:F) | GROUP III (M:F) | (M:F)    | GROUP V (M:F) |
|                   |               |                |              |                |               |               |                |                 |          |               |
| Georgoudis 2017   | 24 (M:F NR)   |                |              |                |               | 20 (M:F NR)   |                |                 |          |               |
|                   |               |                |              |                |               |               |                |                 |          |               |
| García-Marín 2021 | 6:8           |                |              |                |               | 5:9           | 4:10           |                 |          |               |
